# Supplementary material
Source: PubMed Central journal article supplement (PMC6182903)
Supplement: zam021188808s1.pdf [file zam021188808s1.pdf]

Table S1. Baseline dose biases (viral particles) compared with sensitivity analysis model dose biases (viral particles) where the effects of 25% increases and decreases in geometric mean (geomean), geometric standard deviation (geosd), and limit of detection (LOD) on biases were compared\*

| Altered GeoMean         |               |                  |                                                      |                  |                               |                               |
|-------------------------|---------------|------------------|------------------------------------------------------|------------------|-------------------------------|-------------------------------|
| Censoring Degree        | Model Version | Substitution     | MLE                                                  | KM               | MI method 1                   | MI method 2                   |
| Low (10%)               | 25% decrease  | 0.32<br>(0.0069) | -11.30<br>(8.21)                                     | 0.46<br>(0.0098) | 0.26<br>(0.039)               | <b>0.22</b><br><b>(0.043)</b> |
|                         | baseline      | 0.32<br>(0.0071) | -14.74<br>(10.65)                                    | 0.46<br>(0.010)  | 0.25<br>(0.039)               | <b>0.23</b><br><b>(0.043)</b> |
|                         | 25% increase  | 0.32<br>(0.0072) | -16.22<br>(12.09)                                    | 0.47<br>(0.014)  | 0.25<br>(0.040)               | <b>0.23</b><br><b>(0.043)</b> |
| Medium (35%)            | 25% decrease  | 1.13<br>(0.012)  | -4.57<br>(6.78)                                      | 1.64<br>(0.037)  | <b>0.70</b><br><b>(0.091)</b> | 0.80<br>(0.077)               |
|                         | baseline      | 1.13<br>(0.015)  | -6.72<br>(8.97)                                      | 1.63<br>(0.038)  | <b>0.68</b><br><b>(0.095)</b> | 0.80<br>(0.078)               |
|                         | 25% increase  | 1.13<br>(0.015)  | -7.42<br>(9.68)                                      | 1.65<br>(0.057)  | <b>0.68</b><br><b>(0.093)</b> | 0.80<br>(0.078)               |
| High (65%)              | 25% decrease  | 2.10<br>(0.017)  | 3.50<br>(9.12)                                       | 3.10<br>(0.13)   | <b>0.79</b><br><b>(0.14)</b>  | 1.48<br>(0.11)                |
|                         | baseline      | 2.09<br>(0.018)  | 2.56<br>(10.17)                                      | 3.09<br>(0.12)   | <b>0.77</b><br><b>(0.14)</b>  | 1.48<br>(0.11)                |
|                         | 25% increase  | 2.09<br>(0.019)  | 2.90<br>(11.07)                                      | 3.14<br>(0.17)   | <b>0.76</b><br><b>(0.14)</b>  | 1.48<br>(0.11)                |
| Severe (90%)            | 25% decrease  | 2.90<br>(0.019)  | 26.03<br>(115.20)                                    | 4.81<br>(0.85)   | <b>0.42</b><br><b>(0.17)</b>  | 2.04<br>(0.13)                |
|                         | baseline      | 2.90<br>(0.022)  | 92.45<br>(1105.51)                                   | 4.70<br>(0.67)   | <b>0.42</b><br><b>(0.19)</b>  | 2.04<br>(0.13)                |
|                         | 25% increase  | 2.89<br>(0.024)  | 176.84<br>(1977.85)                                  | 4.95<br>(0.88)   | <b>0.40</b><br><b>(0.19)</b>  | 2.04<br>(0.13)                |
| Real Life Example (97%) | 25% decrease  | 3.13<br>(0.020)  | 4.76<br>(1.47 x 10 <sup>12</sup> )                   | 8.53<br>(7.21)   | <b>0.27</b><br><b>(0.35)</b>  | 2.21<br>(0.13)                |
|                         | baseline      | 3.12<br>(0.022)  | 2.94 x 10 <sup>8</sup><br>(8.64 x 10 <sup>9</sup> )  | 8.36<br>(7.20)   | <b>0.25</b><br><b>(0.33)</b>  | 2.20<br>(0.13)                |
|                         | 25% increase  | 3.12<br>(0.025)  | 1.61 x 10 <sup>9</sup><br>(5.00 x 10 <sup>10</sup> ) | 8.55<br>(7.69)   | <b>0.25</b><br><b>(0.33)</b>  | 2.20<br>(0.13)                |
| Altered GeoSD           |               |                  |                                                      |                  |                               |                               |
| Censoring Degree        | Model Version | Substitution     | MLE                                                  | KM               | MI method 1                   | MI method 2                   |

|                               |               |                  |                                                    |                  |                                |                               |
|-------------------------------|---------------|------------------|----------------------------------------------------|------------------|--------------------------------|-------------------------------|
| Low<br>(10%)                  | 25% decrease  | 0.32<br>(0.0054) | -5.03<br>(3.35)                                    | 0.46<br>(0.0088) | 0.27<br>(0.037)                | <b>0.23</b><br><b>(0.043)</b> |
|                               | baseline      | 0.32<br>(0.0071) | -14.74<br>(10.65)                                  | 0.46<br>(0.010)  | 0.25<br>(0.039)                | <b>0.23</b><br><b>(0.043)</b> |
|                               | 25% increase  | 0.32<br>(0.0082) | -30.99<br>(24.36)                                  | 0.47<br>(0.013)  | 0.24<br>(0.040)                | <b>0.23</b><br><b>(0.043)</b> |
| Medium<br>(35%)               | 25% decrease  | 1.13<br>(0.011)  | -1.41<br>(2.78)                                    | 1.63<br>(0.044)  | <b>0.75</b><br><b>(0.089)</b>  | 0.80<br>(0.077)               |
|                               | baseline      | 1.13<br>(0.015)  | -6.72<br>(8.97)                                    | 1.63<br>(0.038)  | <b>0.68</b><br><b>(0.095)</b>  | 0.80<br>(0.078)               |
|                               | 25% increase  | 1.13<br>(0.015)  | -15.48<br>(20.25)                                  | 1.65<br>(0.051)  | <b>0.64</b><br><b>(0.1096)</b> | 0.79<br>(0.077)               |
| High<br>(65%)                 | 25% decrease  | 2.10<br>(0.016)  | 2.11<br>(3.33)                                     | 3.09<br>(0.16)   | <b>0.87</b><br><b>(0.14)</b>   | 1.48<br>(0.11)                |
|                               | baseline      | 2.09<br>(0.018)  | 2.56<br>(10.17)                                    | 3.09<br>(0.12)   | <b>0.77</b><br><b>(0.14)</b>   | 1.48<br>(0.11)                |
|                               | 25% increase  | 2.09<br>(0.020)  | 5.11<br>(24.13)                                    | 3.14<br>(0.16)   | <b>0.71</b><br><b>(0.13)</b>   | 1.48<br>(0.11)                |
| Severe<br>(90%)               | 25% decrease  | 2.90<br>(0.019)  | 12.93<br>(114.53)                                  | 4.81<br>(0.85)   | <b>0.49</b><br><b>(0.20)</b>   | 2.05<br>(0.13)                |
|                               | baseline      | 2.90<br>(0.022)  | 92.45<br>(1105.51)                                 | 4.70<br>(0.67)   | <b>0.42</b><br><b>(0.19)</b>   | 2.04<br>(0.13)                |
|                               | 25% increase  | 2.89<br>(0.024)  | 372.88<br>(3413.11)                                | 4.99<br>(0.96)   | <b>0.36</b><br><b>(0.17)</b>   | 2.03<br>(0.13)                |
| Real Life<br>Example<br>(97%) | 25% decrease  | 3.13<br>(0.019)  | $1.79 \times 10^6$<br>( $4.28 \times 10^7$ )       | 7.90<br>(5.44)   | <b>0.32</b><br><b>(0.38)</b>   | 2.21<br>(0.13)                |
|                               | baseline      | 3.12<br>(0.022)  | $2.94 \times 10^8$<br>( $8.64 \times 10^9$ )       | 8.36<br>(7.20)   | <b>0.25</b><br><b>(0.33)</b>   | 2.20<br>(0.13)                |
|                               | 25% increase  | 3.12<br>(0.025)  | $9.46 \times 10^{17}$<br>( $2.99 \times 10^{19}$ ) | 9.07<br>(9.11)   | <b>0.24</b><br><b>(0.34)</b>   | 2.20<br>(0.13)                |
| Altered LOD                   |               |                  |                                                    |                  |                                |                               |
| Censoring Degree              | Model Version | Substitution     | MLE                                                | KM               | MI method 1                    | MI method 2                   |
| Low<br>(10%)                  | 25% decrease  | 0.24<br>(0.0059) | -13.00<br>(9.68)                                   | 0.35<br>(0.0083) | 0.19<br>(0.030)                | <b>0.17</b><br><b>(0.033)</b> |
|                               | baseline      | 0.32<br>(0.0071) | -14.74<br>(10.65)                                  | 0.46<br>(0.010)  | 0.25<br>(0.039)                | <b>0.23</b><br><b>(0.043)</b> |
|                               | 25% increase  | 0.40<br>(0.0083) | -15.41<br>(11.11)                                  | 0.58<br>(0.011)  | 0.32<br>(0.049)                | <b>0.28</b><br><b>(0.054)</b> |

|                               |              |                 |                                                  |                 |                               |                 |
|-------------------------------|--------------|-----------------|--------------------------------------------------|-----------------|-------------------------------|-----------------|
| Medium<br>(35%)               | 25% decrease | 0.84<br>(0.012) | -6.20<br>(8.16)                                  | 1.22<br>(0.029) | <b>0.51</b><br><b>(0.071)</b> | 0.60<br>(0.059) |
|                               | baseline     | 1.13<br>(0.015) | -6.72<br>(8.97)                                  | 1.63<br>(0.038) | <b>0.68</b><br><b>(0.095)</b> | 0.80<br>(0.078) |
|                               | 25% increase | 1.41<br>(0.016) | -6.00<br>(8.84)                                  | 2.03<br>(0.039) | <b>0.87</b><br><b>(0.12)</b>  | 1.00<br>(0.097) |
| High<br>(65%)                 | 25% decrease | 1.57<br>(0.015) | 1.82<br>(8.78)                                   | 2.32<br>(0.12)  | <b>0.57</b><br><b>(0.10)</b>  | 1.11<br>(0.08)  |
|                               | baseline     | 2.09<br>(0.018) | 2.56<br>(10.17)                                  | 3.09<br>(0.12)  | <b>0.77</b><br><b>(0.14)</b>  | 1.48<br>(0.11)  |
|                               | 25% increase | 2.62<br>(0.022) | 4.10<br>(12.18)                                  | 3.83<br>(0.15)  | <b>0.98</b><br><b>(0.17)</b>  | 1.85<br>(0.13)  |
| Severe<br>(90%)               | 25% decrease | 2.17<br>(0.018) | 94.5<br>(864.08)                                 | 3.66<br>(0.67)  | <b>0.30</b><br><b>(0.14)</b>  | 1.53<br>(0.10)  |
|                               | baseline     | 2.90<br>(0.022) | 92.45<br>(1105.51)                               | 4.70<br>(0.67)  | <b>0.42</b><br><b>(0.19)</b>  | 2.04<br>(0.13)  |
|                               | 25% increase | 3.63<br>(0.026) | 43.84<br>(202.42)                                | 5.98<br>(1.10)  | <b>0.53</b><br><b>(0.24)</b>  | 2.55<br>(0.16)  |
| Real Life<br>Example<br>(97%) | 25% decrease | 2.34<br>(0.018) | $5.56 \times 10^{13}$<br>$(1.75 \times 10^{15})$ | 6.56<br>(7.34)  | <b>0.19</b><br><b>(0.24)</b>  | 1.65<br>(0.099) |
|                               | baseline     | 3.12<br>(0.022) | $2.94 \times 10^8$<br>$(8.64 \times 10^9)$       | 8.36<br>(7.20)  | <b>0.25</b><br><b>(0.33)</b>  | 2.20<br>(0.13)  |
|                               | 25% increase | 3.91<br>(0.027) | $9.23 \times 10^9$<br>$(2.92 \times 10^{11})$    | 10.22<br>(8.57) | <b>0.33</b><br><b>(0.44)</b>  | 2.76<br>(0.17)  |

\*Bolded values indicate that these were the closest to the known values for that degree of censoring

Table S2. Baseline infection risk biases compared with sensitivity analysis model infection risk biases where the effects of 25% increases and decreases in geometric mean (geomean), geometric standard deviation (geosd), and limit of detection (LOD) on biases were compared\*

| Altered GeoMean  |               |                                                       |                                                         |                                                        |                                                                  |                                                                  |
|------------------|---------------|-------------------------------------------------------|---------------------------------------------------------|--------------------------------------------------------|------------------------------------------------------------------|------------------------------------------------------------------|
| Censoring Degree | Model Version | Substitution                                          | MLE                                                     | KM                                                     | MI method 1                                                      | MI method 2                                                      |
| Low (10%)        | 25% decrease  | 1.01 x 10 <sup>-3</sup><br>(5.81 x 10 <sup>-5</sup> ) | -3.54 x 10 <sup>-2</sup><br>(2.45 x 10 <sup>-2</sup> )  | 1.46 x 10 <sup>-3</sup><br>(8.35 x 10 <sup>-5</sup> )  | 8.07 x 10 <sup>-4</sup><br>(1.39 x 10 <sup>-4</sup> )            | <b>7.07 x 10<sup>-4</sup></b><br><b>(1.40 x 10<sup>-4</sup>)</b> |
|                  | baseline      | 9.93 x 10 <sup>-4</sup><br>(6.61 x 10 <sup>-5</sup> ) | -4.55 x 10 <sup>-2</sup><br>(3.091 x 10 <sup>-2</sup> ) | 1.43 x 10 <sup>-3</sup><br>(9.46 x 10 <sup>-5</sup> )  | 7.78 x 10 <sup>-4</sup><br>(1.41 x 10 <sup>-4</sup> )            | <b>6.99 x 10<sup>-4</sup></b><br><b>(1.40 x 10<sup>-4</sup>)</b> |
|                  | 25% increase  | 9.79 x 10 <sup>-4</sup><br>(7.39 x 10 <sup>-5</sup> ) | -4.92 x 10 <sup>-2</sup><br>(3.37 x 10 <sup>-2</sup> )  | 1.42 x 10 <sup>-3</sup><br>(1.08 x 10 <sup>-4</sup> )  | 7.65 x 10 <sup>-4</sup><br>(1.47 x 10 <sup>-4</sup> )            | <b>6.89 x 10<sup>-4</sup></b><br><b>(1.42 x 10<sup>-4</sup>)</b> |
| Medium (35%)     | 25% decrease  | 3.71 x 10 <sup>-3</sup><br>(1.74 x 10 <sup>-4</sup> ) | -1.48 x 10 <sup>-2</sup><br>(2.16 x 10 <sup>-2</sup> )  | 5.37 x 10 <sup>-3</sup><br>(2.73 x 10 <sup>-4</sup> )  | <b>2.30 x 10<sup>-3</sup></b><br><b>(3.58 x 10<sup>-4</sup>)</b> | 2.62 x 10 <sup>-3</sup><br>(2.82 x 10 <sup>-4</sup> )            |
|                  | baseline      | 3.66 x 10 <sup>-3</sup><br>(2.13 x 10 <sup>-4</sup> ) | -2.14 x 10 <sup>-2</sup><br>(2.75 x 10 <sup>-2</sup> )  | 5.28 x 10 <sup>-3</sup><br>(3.26 x 10 <sup>-4</sup> )  | <b>2.23 x 10<sup>-3</sup></b><br><b>(3.81 x 10<sup>-4</sup>)</b> | 2.58 x 10 <sup>-3</sup><br>(2.84 x 10 <sup>-4</sup> )            |
|                  | 25% increase  | 3.62 x 10 <sup>-3</sup><br>(2.22 x 10 <sup>-4</sup> ) | -2.35 x 10 <sup>-2</sup><br>(3.00 x 10 <sup>-2</sup> )  | 5.28 x 10 <sup>-3</sup><br>(3.52 x 10 <sup>-4</sup> )  | <b>2.18 x 10<sup>-3</sup></b><br><b>(3.74 x 10<sup>-4</sup>)</b> | 2.56 x 10 <sup>-3</sup><br>(2.98 x 10 <sup>-4</sup> )            |
| High (65%)       | 25% decrease  | 7.34 x 10 <sup>-3</sup><br>(2.44 x 10 <sup>-4</sup> ) | 1.14 x 10 <sup>-2</sup><br>(2.75 x 10 <sup>-2</sup> )   | 1.07 x 10 <sup>-2</sup><br>(5.51 x 10 <sup>-4</sup> )  | <b>2.76 x 10<sup>-3</sup></b><br><b>(5.27 x 10<sup>-4</sup>)</b> | 5.16 x 10 <sup>-3</sup><br>(4.00 x 10 <sup>-4</sup> )            |
|                  | baseline      | 7.23 x 10 <sup>-3</sup><br>(2.92 x 10 <sup>-4</sup> ) | 8.11 x 10 <sup>-3</sup><br>(3.072 x 10 <sup>-2</sup> )  | 1.065 x 10 <sup>-2</sup><br>(5.77 x 10 <sup>-4</sup> ) | <b>2.68 x 10<sup>-3</sup></b><br><b>(5.54 x 10<sup>-4</sup>)</b> | 5.10 x 10 <sup>-3</sup><br>(4.22 x 10 <sup>-4</sup> )            |
|                  | 25% increase  | 7.25 x 10 <sup>-3</sup><br>(3.41 x 10 <sup>-4</sup> ) | 9.16 x 10 <sup>-3</sup>                                 | 1.08 x 10 <sup>-2</sup>                                | <b>2.63 x 10<sup>-3</sup></b>                                    | 5.06 x 10 <sup>-3</sup>                                          |

|                         |               |                                                       |                                                         |                                                       |                                                                  |                                                                  |
|-------------------------|---------------|-------------------------------------------------------|---------------------------------------------------------|-------------------------------------------------------|------------------------------------------------------------------|------------------------------------------------------------------|
|                         |               |                                                       | (3.41 x 10 <sup>-2</sup> )                              | (7.38 x 10 <sup>-4</sup> )                            | <b>(5.67 x 10<sup>-4</sup>)</b>                                  | (4.44 x 10 <sup>-4</sup> )                                       |
| Severe (90%)            | 25% decrease  | 1.106x 10 <sup>-2</sup><br>(2.05 x 10 <sup>-4</sup> ) | 5.70x 10 <sup>-2</sup><br>(1.37 x 10 <sup>-1</sup> )    | 1.7 5x 10 <sup>-2</sup><br>(3.01 x 10 <sup>-3</sup> ) | <b>1.54 x 10<sup>-3</sup></b><br><b>(6.41 x 10<sup>-4</sup>)</b> | 7.47 x 10 <sup>-3</sup><br>(4.95 x 10 <sup>-4</sup> )            |
|                         | baseline      | 1.05 x 10 <sup>-2</sup><br>(2.48 x 10 <sup>-4</sup> ) | 6.37 x 10 <sup>-2</sup><br>(1.49 x 10 <sup>-1</sup> )   | 1.70 x 10 <sup>-2</sup><br>(2.38 x 10 <sup>-3</sup> ) | <b>1.55 x 10<sup>-3</sup></b><br><b>(7.29 x 10<sup>-4</sup>)</b> | 7.44 x 10 <sup>-3</sup><br>(4.98 x 10 <sup>-4</sup> )            |
|                         | 25% increase  | 1.05 x 10 <sup>-2</sup><br>(2.74 x 10 <sup>-4</sup> ) | 8.53 x 10 <sup>-2</sup><br>(1.86 x 10 <sup>-1</sup> )   | 1.79 x 10 <sup>-2</sup><br>(3.12 x 10 <sup>-3</sup> ) | <b>1.47 x 10<sup>-3</sup></b><br><b>(7.29 x 10<sup>-4</sup>)</b> | 7.40 x 10 <sup>-3</sup><br>(5.05 x 10 <sup>-4</sup> )            |
| Real Life Example (97%) | 25% decrease  | 1.16 x 10 <sup>-2</sup><br>(1.36 x 10 <sup>-4</sup> ) | 1.59 x 10 <sup>-1</sup><br>(3.20 x 10 <sup>-1</sup> )   | 3.08 x 10 <sup>-2</sup><br>(2.41 x 10 <sup>-2</sup> ) | <b>1.01 x 10<sup>-3</sup></b><br><b>(1.30 x 10<sup>-3</sup>)</b> | 8.17 x 10 <sup>-3</sup><br>(4.94 x 10 <sup>-4</sup> )            |
|                         | baseline      | 1.15 x 10 <sup>-2</sup><br>(1.55 x 10 <sup>-4</sup> ) | 1.77 x 10 <sup>-1</sup><br>(3.36 x 10 <sup>-1</sup> )   | 3.02 x 10 <sup>-2</sup><br>(2.39 x 10 <sup>-2</sup> ) | <b>9.48 x 10<sup>-4</sup></b><br><b>(1.23 x 10<sup>-3</sup>)</b> | 8.16 x 10 <sup>-3</sup><br>(4.95 x 10 <sup>-4</sup> )            |
|                         | 25% increase  | 1.15 x 10 <sup>-2</sup><br>(1.61 x 10 <sup>-4</sup> ) | 1.83 x 10 <sup>-1</sup><br>(3.39 x 10 <sup>-1</sup> )   | 3.08 x 10 <sup>-2</sup><br>(2.52 x 10 <sup>-2</sup> ) | <b>9.34 x 10<sup>-4</sup></b><br><b>(1.22 x 10<sup>-3</sup>)</b> | 8.13 x 10 <sup>-3</sup><br>(5.01 x 10 <sup>-4</sup> )            |
| Altered GeoSD           |               |                                                       |                                                         |                                                       |                                                                  |                                                                  |
| Censoring Degree        | Model Version | Substitution                                          | MLE                                                     | KM                                                    | MI method 1                                                      | MI method 2                                                      |
| Low (10%)               | 25% decrease  | 1.07 x 10 <sup>-3</sup><br>(3.48 x 10 <sup>-5</sup> ) | -1.67 x 10 <sup>-2</sup><br>(1.09 x 10 <sup>-2</sup> )  | 1.53 x 10 <sup>-3</sup><br>(5.03 x 10 <sup>-5</sup> ) | 9.11 x 10 <sup>-4</sup><br>(1.32 x 10 <sup>-4</sup> )            | <b>7.52 x 10<sup>-4</sup></b><br><b>(1.43 x 10<sup>-4</sup>)</b> |
|                         | baseline      | 9.93 x 10 <sup>-4</sup><br>(6.61 x 10 <sup>-5</sup> ) | -4.55 x 10 <sup>-2</sup><br>(3.091 x 10 <sup>-2</sup> ) | 1.43 x 10 <sup>-3</sup><br>(9.46 x 10 <sup>-5</sup> ) | 7.78 x 10 <sup>-4</sup><br>(1.41 x 10 <sup>-4</sup> )            | <b>6.99 x 10<sup>-4</sup></b><br><b>(1.40 x 10<sup>-4</sup>)</b> |
|                         | 25% increase  | 8.92 x 10 <sup>-4</sup><br>(1.12 x 10 <sup>-4</sup> ) | -8.59 x 10 <sup>-2</sup>                                | 1.30 x 10 <sup>-3</sup>                               | 6.70 x 10 <sup>-4</sup><br>(1.52 x 10 <sup>-4</sup> )            | <b>6.22 x 10<sup>-4</sup></b><br><b>(1.42 x 10<sup>-4</sup>)</b> |

|                 |              |                                                       |                                                        |                                                        |                                                                  |                                                       |
|-----------------|--------------|-------------------------------------------------------|--------------------------------------------------------|--------------------------------------------------------|------------------------------------------------------------------|-------------------------------------------------------|
|                 |              |                                                       | (5.99 x 10 <sup>-2</sup> )                             | (1.62 x 10 <sup>-4</sup> )                             |                                                                  |                                                       |
| Medium<br>(35%) | 25% decrease | 3.87 x 10 <sup>-3</sup><br>(9.71 x 10 <sup>-5</sup> ) | -4.81 x 10 <sup>-3</sup><br>(9.43 x 10 <sup>-3</sup> ) | 5.57 x 10 <sup>-3</sup><br>(1.82 x 10 <sup>-4</sup> )  | <b>2.58 x 10<sup>-3</sup></b><br><b>(3.39 x 10<sup>-4</sup>)</b> | 2.74 x 10 <sup>-3</sup><br>(2.74 x 10 <sup>-4</sup> ) |
|                 | baseline     | 3.66 x 10 <sup>-3</sup><br>(2.13 x 10 <sup>-4</sup> ) | -2.14 x 10 <sup>-2</sup><br>(2.75 x 10 <sup>-2</sup> ) | 5.28 x 10 <sup>-3</sup><br>(3.26 x 10 <sup>-4</sup> )  | <b>2.23 x 10<sup>-3</sup></b><br><b>(3.81 x 10<sup>-4</sup>)</b> | 2.58 x 10 <sup>-3</sup><br>(2.84 x 10 <sup>-4</sup> ) |
|                 | 25% increase | 3.38 x 10 <sup>-3</sup><br>(3.70 x 10 <sup>-4</sup> ) | -4.48 x 10 <sup>-2</sup><br>(5.46 x 10 <sup>-2</sup> ) | 4.96 x 10 <sup>-3</sup><br>(5.55 x 10 <sup>-4</sup> )  | <b>1.95 x 10<sup>-3</sup></b><br><b>(4.24 x 10<sup>-4</sup>)</b> | 2.39 x 10 <sup>-3</sup><br>(3.38 x 10 <sup>-4</sup> ) |
| High<br>(65%)   | 25% decrease | 7.47 x 10 <sup>-3</sup><br>(1.35 x 10 <sup>-4</sup> ) | 7.39 x 10 <sup>-3</sup><br>(1.14 x 10 <sup>-2</sup> )  | 1.10 x 10 <sup>-2</sup><br>(5.77 x 10 <sup>-4</sup> )  | <b>3.11 x 10<sup>-3</sup></b><br><b>(5.32 x 10<sup>-4</sup>)</b> | 5.29 x 10 <sup>-3</sup><br>(3.84 x 10 <sup>-4</sup> ) |
|                 | baseline     | 7.23 x 10 <sup>-3</sup><br>(2.92 x 10 <sup>-4</sup> ) | 8.11 x 10 <sup>-3</sup><br>(3.072 x 10 <sup>-2</sup> ) | 1.065 x 10 <sup>-2</sup><br>(5.77 x 10 <sup>-4</sup> ) | <b>2.68 x 10<sup>-3</sup></b><br><b>(5.54 x 10<sup>-4</sup>)</b> | 5.10 x 10 <sup>-3</sup><br>(4.22 x 10 <sup>-4</sup> ) |
|                 | 25% increase | 6.94 x 10 <sup>-3</sup><br>(5.33 x 10 <sup>-4</sup> ) | 1.41 x 10 <sup>-2</sup><br>(5.89 x 10 <sup>-2</sup> )  | 1.04 x 10 <sup>-2</sup><br>(9.09 x 10 <sup>-4</sup> )  | <b>2.36 x 10<sup>-3</sup></b><br><b>(5.58 x 10<sup>-4</sup>)</b> | 4.91 x 10 <sup>-3</sup><br>(5.14 x 10 <sup>-4</sup> ) |
| Severe<br>(90%) | 25% decrease | 1.07 x 10 <sup>-2</sup><br>(1.18 x 10 <sup>-4</sup> ) | 2.71 x 10 <sup>-2</sup><br>(8.28 x 10 <sup>-2</sup> )  | 1.76 x 10 <sup>-2</sup><br>(3.03 x 10 <sup>-3</sup> )  | <b>1.81 x 10<sup>-3</sup></b><br><b>(7.59 x 10<sup>-4</sup>)</b> | 7.53 x 10 <sup>-3</sup><br>(4.76 x 10 <sup>-4</sup> ) |
|                 | baseline     | 1.05 x 10 <sup>-2</sup><br>(2.48 x 10 <sup>-4</sup> ) | 6.37 x 10 <sup>-2</sup><br>(1.49 x 10 <sup>-1</sup> )  | 1.70 x 10 <sup>-2</sup><br>(2.38 x 10 <sup>-3</sup> )  | <b>1.55 x 10<sup>-3</sup></b><br><b>(7.29 x 10<sup>-4</sup>)</b> | 7.44 x 10 <sup>-3</sup><br>(4.98 x 10 <sup>-4</sup> ) |
|                 | 25% increase | 1.04 x 10 <sup>-2</sup><br>(4.09 x 10 <sup>-4</sup> ) | 1.22 x 10 <sup>-1</sup><br>(2.35 x 10 <sup>-1</sup> )  | 1.79 x 10 <sup>-2</sup><br>(3.37 x 10 <sup>-3</sup> )  | <b>1.33 x 10<sup>-3</sup></b><br><b>(6.26 x 10<sup>-4</sup>)</b> | 7.34 x 10 <sup>-3</sup><br>(5.50 x 10 <sup>-4</sup> ) |
|                 | 25% decrease | 1.16 x 10 <sup>-2</sup><br>(9.08 x 10 <sup>-5</sup> ) | 9.09 x 10 <sup>-2</sup>                                | 2.88 x 10 <sup>-3</sup>                                | <b>1.18 x 10<sup>-3</sup></b>                                    | 8.20 x 10 <sup>-3</sup>                               |

|                         |               |                                                       |                                                         |                                                       |                                                                  |                                                                  |
|-------------------------|---------------|-------------------------------------------------------|---------------------------------------------------------|-------------------------------------------------------|------------------------------------------------------------------|------------------------------------------------------------------|
| Real Life Example (97%) |               |                                                       | (2.44 x 10 <sup>-1</sup> )                              | (1.86 x 10 <sup>-5</sup> )                            | <b>(1.43 x 10<sup>-3</sup>)</b>                                  | (4.85 x 10 <sup>-4</sup> )                                       |
|                         | baseline      | 1.15 x 10 <sup>-2</sup><br>(1.55 x 10 <sup>-4</sup> ) | 1.77 x 10 <sup>-1</sup><br>(3.36 x 10 <sup>-1</sup> )   | 3.02 x 10 <sup>-2</sup><br>(2.39 x 10 <sup>-2</sup> ) | <b>9.48 x 10<sup>-4</sup></b><br><b>(1.23 x 10<sup>-3</sup>)</b> | 8.16 x 10 <sup>-3</sup><br>(4.95 x 10 <sup>-4</sup> )            |
|                         | 25% increase  | 1.14 x 10 <sup>-2</sup><br>(2.83 x 10 <sup>-4</sup> ) | 2.19 x 10 <sup>-1</sup><br>(3.69 x 10 <sup>-1</sup> )   | 3.24 x 10 <sup>-2</sup><br>(2.84 x 10 <sup>-2</sup> ) | <b>8.86 x 10<sup>-4</sup></b><br><b>(1.26 x 10<sup>-3</sup>)</b> | 8.10 x 10 <sup>-3</sup><br>(5.21 x 10 <sup>-4</sup> )            |
| Altered LOD             |               |                                                       |                                                         |                                                       |                                                                  |                                                                  |
| Censoring Degree        | Model Version | Substitution                                          | MLE                                                     | KM                                                    | MI method 1                                                      | MI method 2                                                      |
| Low (10%)               | 25% decrease  | 7.69 x 10 <sup>-4</sup><br>(4.81 x 10 <sup>-5</sup> ) | -4.14 x 10 <sup>-2</sup><br>(2.90 x 10 <sup>-2</sup> )  | 1.11 x 10 <sup>-3</sup><br>(6.82 x 10 <sup>-5</sup> ) | 6.00 x 10 <sup>-4</sup><br>(1.11 x 10 <sup>-4</sup> )            | <b>5.38 x 10<sup>-4</sup></b><br><b>(1.10 x 10<sup>-4</sup>)</b> |
|                         | baseline      | 9.93 x 10 <sup>-4</sup><br>(6.61 x 10 <sup>-5</sup> ) | -4.55 x 10 <sup>-2</sup><br>(3.091 x 10 <sup>-2</sup> ) | 1.43 x 10 <sup>-3</sup><br>(9.46 x 10 <sup>-5</sup> ) | 7.78 x 10 <sup>-4</sup><br>(1.41 x 10 <sup>-4</sup> )            | <b>6.99 x 10<sup>-4</sup></b><br><b>(1.40 x 10<sup>-4</sup>)</b> |
|                         | 25% increase  | 1.21 x 10 <sup>-3</sup><br>(8.83 x 10 <sup>-5</sup> ) | -4.61 x 10 <sup>-2</sup><br>(3.11 x 10 <sup>-2</sup> )  | 1.73 x 10 <sup>-3</sup><br>(1.25 x 10 <sup>-4</sup> ) | 9.58 x 10 <sup>-4</sup><br>(1.75 x 10 <sup>-4</sup> )            | <b>8.43 x 10<sup>-4</sup></b><br><b>(1.69 x 10<sup>-4</sup>)</b> |
| Medium (35%)            | 25% decrease  | 2.83 x 10 <sup>-3</sup><br>(1.44 x 10 <sup>-4</sup> ) | -2.03 x 10 <sup>-2</sup><br>(2.59 x 10 <sup>-2</sup> )  | 4.06 x 10 <sup>-3</sup><br>(2.24 x 10 <sup>-4</sup> ) | <b>1.69 x 10<sup>-3</sup></b><br><b>(2.83 x 10<sup>-4</sup>)</b> | 1.98 x 10 <sup>-3</sup><br>(2.21 x 10 <sup>-4</sup> )            |
|                         | baseline      | 3.66 x 10 <sup>-3</sup><br>(2.13 x 10 <sup>-4</sup> ) | -2.14 x 10 <sup>-2</sup><br>(2.75 x 10 <sup>-2</sup> )  | 5.28 x 10 <sup>-3</sup><br>(3.26 x 10 <sup>-4</sup> ) | <b>2.23 x 10<sup>-3</sup></b><br><b>(3.81 x 10<sup>-4</sup>)</b> | 2.58 x 10 <sup>-3</sup><br>(2.84 x 10 <sup>-4</sup> )            |
|                         | 25% increase  | 4.48 x 10 <sup>-3</sup><br>(2.69 x 10 <sup>-4</sup> ) | -1.88 x 10 <sup>-2</sup><br>(2.69 x 10 <sup>-2</sup> )  | 6.45 x 10 <sup>-3</sup><br>(3.92 x 10 <sup>-4</sup> ) | <b>2.77 x 10<sup>-3</sup></b><br><b>(4.63 x 10<sup>-4</sup>)</b> | 3.17 x 10 <sup>-3</sup><br>(3.59 x 10 <sup>-4</sup> )            |
| High (65%)              | 25% decrease  | 5.48 x 10 <sup>-3</sup><br>(2.06 x 10 <sup>-4</sup> ) | 5.96 x 10 <sup>-3</sup>                                 | 8.10 x 10 <sup>-3</sup>                               | <b>2.00 x 10<sup>-3</sup></b><br><b>(4.11 x 10<sup>-4</sup>)</b> | 3.88 x 10 <sup>-3</sup><br>(3.14 x 10 <sup>-4</sup> )            |

|                         |              |                                                       |                                                        |                                                        |                                                                  |                                                       |
|-------------------------|--------------|-------------------------------------------------------|--------------------------------------------------------|--------------------------------------------------------|------------------------------------------------------------------|-------------------------------------------------------|
|                         |              |                                                       | (2.80 x 10 <sup>-2</sup> )                             | (4.83 x 10 <sup>-4</sup> )                             |                                                                  |                                                       |
|                         | baseline     | 7.23 x 10 <sup>-3</sup><br>(2.92 x 10 <sup>-4</sup> ) | 8.11 x 10 <sup>-3</sup><br>(3.072 x 10 <sup>-2</sup> ) | 1.065 x 10 <sup>-2</sup><br>(5.77 x 10 <sup>-4</sup> ) | <b>2.68 x 10<sup>-3</sup></b><br><b>(5.54 x 10<sup>-4</sup>)</b> | 5.10 x 10 <sup>-3</sup><br>(4.22 x 10 <sup>-4</sup> ) |
|                         | 25% increase | 8.92 x 10 <sup>-3</sup><br>(3.91 x 10 <sup>-4</sup> ) | 1.28 x 10 <sup>-2</sup><br>(3.53 x 10 <sup>-2</sup> )  | 1.30 x 10 <sup>-2</sup><br>(7.35 x 10 <sup>-4</sup> )  | <b>3.36 x 10<sup>-3</sup></b><br><b>(6.86 x 10<sup>-4</sup>)</b> | 6.32 x 10 <sup>-3</sup><br>(5.21 x 10 <sup>-4</sup> ) |
| Severe (90%)            | 25% decrease | 7.93 x 10 <sup>-3</sup><br>(1.70 x 10 <sup>-4</sup> ) | 6.62 x 10 <sup>-2</sup><br>(1.65 x 10 <sup>-1</sup> )  | 1.34 x 10 <sup>-2</sup><br>(2.38 x 10 <sup>-3</sup> )  | <b>1.11 x 10<sup>-3</sup></b><br><b>(5.14 x 10<sup>-4</sup>)</b> | 5.59 x 10 <sup>-3</sup><br>(3.74 x 10 <sup>-4</sup> ) |
|                         | baseline     | 1.05 x 10 <sup>-2</sup><br>(2.48 x 10 <sup>-4</sup> ) | 6.37 x 10 <sup>-2</sup><br>(1.49 x 10 <sup>-1</sup> )  | 1.70 x 10 <sup>-2</sup><br>(2.38 x 10 <sup>-3</sup> )  | <b>1.55 x 10<sup>-3</sup></b><br><b>(7.29 x 10<sup>-4</sup>)</b> | 7.44 x 10 <sup>-3</sup><br>(4.98 x 10 <sup>-4</sup> ) |
|                         | 25% increase | 1.31 x 10 <sup>-2</sup><br>(3.21 x 10 <sup>-4</sup> ) | 7.05 x 10 <sup>-2</sup><br>(1.60 x 10 <sup>-1</sup> )  | 2.16 x 10 <sup>-2</sup><br>(3.85 x 10 <sup>-3</sup> )  | <b>1.93 x 10<sup>-3</sup></b><br><b>(8.91 x 10<sup>-4</sup>)</b> | 9.27 x 10 <sup>-3</sup><br>(6.27 x 10 <sup>-4</sup> ) |
| Real Life Example (97%) | 25% decrease | 8.69 x 10 <sup>-3</sup><br>(1.21 x 10 <sup>-4</sup> ) | 1.57 x 10 <sup>-3</sup><br>(3.24 x 10 <sup>-1</sup> )  | 2.37 x 10 <sup>-2</sup><br>(2.37 x 10 <sup>-2</sup> )  | <b>7.11 x 10<sup>-4</sup></b><br><b>(8.98 x 10<sup>-4</sup>)</b> | 6.11 x 10 <sup>-3</sup><br>(3.75 x 10 <sup>-4</sup> ) |
|                         | baseline     | 1.15 x 10 <sup>-2</sup><br>(1.55 x 10 <sup>-4</sup> ) | 1.77 x 10 <sup>-1</sup><br>(3.36 x 10 <sup>-1</sup> )  | 3.02 x 10 <sup>-2</sup><br>(2.39 x 10 <sup>-2</sup> )  | <b>9.48 x 10<sup>-4</sup></b><br><b>(1.23 x 10<sup>-3</sup>)</b> | 8.16 x 10 <sup>-3</sup><br>(4.95 x 10 <sup>-4</sup> ) |
|                         | 25% increase | 1.44 x 10 <sup>-2</sup><br>(2.07 x 10 <sup>-4</sup> ) | 1.68 x 10 <sup>-1</sup><br>(3.25 x 10 <sup>-1</sup> )  | 3.67 x 10 <sup>-2</sup><br>(2.76 x 10 <sup>-2</sup> )  | <b>1.22 x 10<sup>-3</sup></b><br><b>(1.64 x 10<sup>-3</sup>)</b> | 1.02 x 10 <sup>-2</sup><br>(6.17 x 10 <sup>-4</sup> ) |

\*Bolded values indicate that these were the closest to the known values for that degree of censoring



Table S3. Baseline RMSE biases (viral particles) compared with sensitivity analysis model dose RMSE (viral particles) where the effects of 25% increases and decreases in geometric mean (geomean), geometric standard deviation (geosd), and limit of detection (LOD) on RMSEs were compared\*

| Altered GeoMean         |               |                  |                                                    |                  |                               |                               |
|-------------------------|---------------|------------------|----------------------------------------------------|------------------|-------------------------------|-------------------------------|
| Censoring Degree        | Model Version | Substitution     | MLE                                                | KM               | MI method 1                   | MI method 2                   |
| Low (10%)               | 25% decrease  | 0.32<br>(0.0069) | 11.31<br>(8.21)                                    | 0.46<br>(0.0098) | 0.26<br>(0.039)               | <b>0.23</b><br><b>(0.043)</b> |
|                         | baseline      | 0.32<br>(0.0071) | 14.75<br>(10.63)                                   | 0.46<br>(0.010)  | 0.25<br>(0.039)               | <b>0.23</b><br><b>(0.043)</b> |
|                         | 25% increase  | 0.32<br>(0.0072) | 16.23<br>(12.08)                                   | 0.47<br>(0.014)  | 0.25<br>(0.040)               | <b>0.23</b><br><b>(0.043)</b> |
| Medium (35%)            | 25% decrease  | 0.23<br>(0.012)  | 5.55<br>(6.01)                                     | 1.64<br>(0.037)  | <b>0.70</b><br><b>(0.091)</b> | 0.80<br>(0.078)               |
|                         | baseline      | 1.13<br>(0.014)  | 7.51<br>(8.32)                                     | 1.63<br>(0.038)  | <b>0.68</b><br><b>(0.095)</b> | 0.80<br>(0.078)               |
|                         | 25% increase  | 1.13<br>(0.015)  | 8.36<br>(8.89)                                     | 1.65<br>(0.057)  | <b>0.68</b><br><b>(0.093)</b> | 0.80<br>(0.078)               |
| High (65%)              | 25% decrease  | 2.10<br>(0.017)  | 5.44<br>(8.11)                                     | 3.09<br>(0.13)   | <b>0.79</b><br><b>(0.14)</b>  | 1.48<br>(0.11)                |
|                         | baseline      | 2.093<br>(0.018) | 5.79<br>(8.74)                                     | 3.087<br>(0.12)  | <b>0.78</b><br><b>(0.14)</b>  | 1.48<br>(0.11)                |
|                         | 25% increase  | 2.09<br>(0.019)  | 6.88<br>(9.14)                                     | 3.14<br>(0.17)   | <b>0.76</b><br><b>(0.14)</b>  | 1.48<br>(0.11)                |
| Severe (90%)            | 25% decrease  | 2.90<br>(0.019)  | 26.26<br>(115.15)                                  | 4.81<br>(0.85)   | <b>0.42</b><br><b>(0.17)</b>  | 2.044<br>(0.13)               |
|                         | baseline      | 2.90<br>(0.022)  | 92.64<br>(1105.50)                                 | 4.70<br>(0.67)   | <b>0.42</b><br><b>(0.19)</b>  | 2.041<br>(0.13)               |
|                         | 25% increase  | 2.89<br>(0.024)  | 177.09<br>(1977.83)                                | 4.95<br>(0.88)   | <b>0.40</b><br><b>(0.19)</b>  | 2.04<br>(0.13)                |
| Real Life Example (97%) | 25% decrease  | 3.13<br>(0.020)  | $4.76 \times 10^{10}$<br>( $1.47 \times 10^{12}$ ) | 8.53<br>(7.21)   | <b>0.27</b><br><b>(0.35)</b>  | 2.21<br>(0.13)                |
|                         | baseline      | 3.12<br>(0.022)  | $2.94 \times 10^8$<br>( $8.64 \times 10^9$ )       | 8.36<br>(7.20)   | <b>0.26</b><br><b>(0.33)</b>  | 2.20<br>(0.13)                |
|                         | 25% increase  | 3.12<br>(0.025)  | $1.61 \times 10^9$<br>( $4.98 \times 10^{10}$ )    | 8.55<br>(7.69)   | <b>0.25</b><br><b>(0.33)</b>  | 2.20<br>(0.13)                |

| Altered GeoSD           |               |                  |                                                    |                  |                               |                               |
|-------------------------|---------------|------------------|----------------------------------------------------|------------------|-------------------------------|-------------------------------|
| Censoring Degree        | Model Version | Substitution     | MLE                                                | KM               | MI method 1                   | MI method 2                   |
| Low (10%)               | 25% decrease  | 0.32<br>(0.0054) | 5.03<br>(3.34)                                     | 0.46<br>(0.0088) | 0.27<br>(0.037)               | <b>0.23</b><br><b>(0.043)</b> |
|                         | baseline      | 0.32<br>(0.0071) | 14.75<br>(10.63)                                   | 0.46<br>(0.010)  | 0.25<br>(0.039)               | <b>0.23</b><br><b>(0.043)</b> |
|                         | 25% increase  | 0.32<br>(0.0082) | 30.99<br>(24.36)                                   | 0.47<br>(0.013)  | 0.24<br>(0.040)               | <b>0.22</b><br><b>(0.043)</b> |
| Medium (35%)            | 25% decrease  | 1.13<br>(0.011)  | 2.23<br>(2.18)                                     | 1.63<br>(0.044)  | <b>0.75</b><br><b>(0.089)</b> | 0.80<br>(0.077)               |
|                         | baseline      | 1.13<br>(0.014)  | 7.51<br>(8.32)                                     | 1.63<br>(0.038)  | <b>0.68</b><br><b>(0.095)</b> | 0.80<br>(0.078)               |
|                         | 25% increase  | 1.12<br>(0.015)  | 16.62<br>(19.33)                                   | 1.65<br>(0.051)  | <b>0.64</b><br><b>(0.096)</b> | 0.79<br>(0.077)               |
| High (65%)              | 25% decrease  | 2.10<br>(0.016)  | 2.74<br>(2.83)                                     | 3.09<br>(0.16)   | <b>0.87</b><br><b>(0.14)</b>  | 1.48<br>(0.11)                |
|                         | baseline      | 2.093<br>(0.018) | 5.79<br>(8.74)                                     | 3.087<br>(0.12)  | <b>0.78</b><br><b>(0.14)</b>  | 1.48<br>(0.11)                |
|                         | 25% increase  | 2.09<br>(0.020)  | 12.67<br>(21.16)                                   | 3.14<br>(0.16)   | <b>0.71</b><br><b>(0.13)</b>  | 1.47<br>(0.11)                |
| Severe (90%)            | 25% decrease  | 2.90<br>(0.019)  | 13.02<br>(114.51)                                  | 4.81<br>(0.85)   | <b>0.49</b><br><b>(0.20)</b>  | 2.05<br>(0.13)                |
|                         | baseline      | 2.90<br>(0.022)  | 92.64<br>(1105.50)                                 | 4.70<br>(0.67)   | <b>0.42</b><br><b>(0.19)</b>  | 2.041<br>(0.13)               |
|                         | 25% increase  | 2.89<br>(0.02)   | 373.39<br>(3413.05)                                | 4.99<br>(0.96)   | <b>0.36</b><br><b>(0.17)</b>  | 2.03<br>(0.13)                |
| Real Life Example (97%) | 25% decrease  | 3.13<br>(0.019)  | $1.79 \times 10^6$<br>( $4.28 \times 10^7$ )       | 7.90<br>(5.44)   | <b>0.32</b><br><b>(0.38)</b>  | 2.21<br>(0.13)                |
|                         | baseline      | 3.12<br>(0.022)  | $2.94 \times 10^8$<br>( $8.64 \times 10^9$ )       | 8.36<br>(7.20)   | <b>0.26</b><br><b>(0.33)</b>  | 2.20<br>(0.13)                |
|                         | 25% increase  | 3.12<br>(0.025)  | $9.46 \times 10^{17}$<br>( $2.99 \times 10^{19}$ ) | 9.07<br>(9.11)   | <b>0.24</b><br><b>(0.34)</b>  | 2.20<br>(0.13)                |
| Altered LOD             |               |                  |                                                    |                  |                               |                               |

| Censoring Degree        | Model Version | Substitution     | MLE                                                | KM               | MI method 1                   | MI method 2                   |
|-------------------------|---------------|------------------|----------------------------------------------------|------------------|-------------------------------|-------------------------------|
| Low (10%)               | 25% decrease  | 0.24<br>(0.0059) | 13.01<br>(9.67)                                    | 0.35<br>(0.0083) | 0.19<br>(0.030)               | <b>0.17</b><br><b>(0.033)</b> |
|                         | baseline      | 0.32<br>(0.0071) | 14.75<br>(10.63)                                   | 0.46<br>(0.010)  | 0.25<br>(0.039)               | <b>0.23</b><br><b>(0.043)</b> |
|                         | 25% increase  | 0.40<br>(0.0083) | 15.41<br>(11.11)                                   | 0.58<br>(0.011)  | 0.32<br>(0.049)               | <b>0.28</b><br><b>(0.054)</b> |
| Medium (35%)            | 25% decrease  | 0.84<br>(0.012)  | 6.93<br>(7.56)                                     | 1.22<br>(0.029)  | <b>0.50</b><br><b>(0.071)</b> | 0.60<br>(0.059)               |
|                         | baseline      | 1.13<br>(0.014)  | 7.51<br>(8.32)                                     | 1.63<br>(0.038)  | <b>0.68</b><br><b>(0.095)</b> | 0.80<br>(0.078)               |
|                         | 25% increase  | 1.41<br>(0.016)  | 7.35<br>(7.74)                                     | 2.03<br>(0.039)  | <b>0.87</b><br><b>(0.12)</b>  | 1.00<br>(0.097)               |
| High (65%)              | 25% decrease  | 1.57<br>(0.015)  | 5.20<br>(7.30)                                     | 2.32<br>(0.12)   | <b>0.57</b><br><b>(0.10)</b>  | 1.11<br>(0.081)               |
|                         | baseline      | 2.093<br>(0.018) | 5.79<br>(8.74)                                     | 3.087<br>(0.12)  | <b>0.78</b><br><b>(0.14)</b>  | 1.48<br>(0.11)                |
|                         | 25% increase  | 2.62<br>(0.022)  | 7.18<br>(10.66)                                    | 3.83<br>(0.15)   | <b>0.98</b><br><b>(0.17)</b>  | 1.85<br>(0.13)                |
| Severe (90%)            | 25% decrease  | 2.17<br>(0.018)  | 94.8<br>(864.05)                                   | 3.66<br>(0.67)   | <b>0.30</b><br><b>(0.14)</b>  | 1.53<br>(0.10)                |
|                         | baseline      | 2.90<br>(0.022)  | 92.64<br>(1105.50)                                 | 4.70<br>(0.67)   | <b>0.42</b><br><b>(0.19)</b>  | 2.041<br>(0.13)               |
|                         | 25% increase  | 3.63<br>(0.026)  | 44.12<br>(202.36)                                  | 5.98<br>(1.10)   | <b>0.53</b><br><b>(0.24)</b>  | 2.55<br>(0.097)               |
| Real Life Example (97%) | 25% decrease  | 2.34<br>(0.018)  | $5.56 \times 10^{13}$<br>( $1.75 \times 10^{15}$ ) | 6.56<br>(7.34)   | <b>0.19</b><br><b>(0.24)</b>  | 1.65<br>(0.16)                |
|                         | baseline      | 3.12<br>(0.022)  | $2.94 \times 10^8$<br>( $8.64 \times 10^9$ )       | 8.36<br>(7.20)   | <b>0.26</b><br><b>(0.33)</b>  | 2.20<br>(0.13)                |
|                         | 25% increase  | 3.91<br>(0.027)  | $9.23 \times 10^9$<br>( $2.92 \times 10^{11}$ )    | 10.22<br>(8.57)  | <b>0.33</b><br><b>(0.44)</b>  | 2.76<br>(0.097)               |

\*Bolded values indicate that these were the closest to the known values for that degree of censoring

Table S4. Baseline infection risk RMSE compared with sensitivity analysis model infection risk RMSE where the effects of 25% increases and decreases in geometric mean (geomean), geometric standard deviation (geosd), and limit of detection (LOD) on RMSEs were compared\*

| Altered GeoMean  |               |                                                    |                                                     |                                                    |                                                                                      |                                                                                      |
|------------------|---------------|----------------------------------------------------|-----------------------------------------------------|----------------------------------------------------|--------------------------------------------------------------------------------------|--------------------------------------------------------------------------------------|
| Censoring Degree | Model Version | Substitution                                       | MLE                                                 | KM                                                 | MI method 1                                                                          | MI method 2                                                                          |
| Low (10%)        | 25% decrease  | $1.01 \times 10^{-3}$<br>( $5.81 \times 10^{-5}$ ) | $3.54 \times 10^{-2}$<br>( $2.45 \times 10^{-2}$ )  | $1.46 \times 10^{-3}$<br>( $8.35 \times 10^{-5}$ ) | $8.07 \times 10^{-4}$<br>( $1.39 \times 10^{-4}$ )                                   | <b><math>7.07 \times 10^{-4}</math></b><br><b>(<math>1.40 \times 10^{-4}</math>)</b> |
|                  | baseline      | $9.99 \times 10^{-4}$<br>( $6.61 \times 10^{-5}$ ) | $4.56 \times 10^{-2}$<br>( $3.09 \times 10^{-2}$ )  | $1.43 \times 10^{-3}$<br>( $9.46 \times 10^{-5}$ ) | $7.78 \times 10^{-4}$<br>( $1.41 \times 10^{-4}$ )                                   | <b><math>6.94 \times 10^{-4}</math></b><br><b>(<math>1.39 \times 10^{-4}</math>)</b> |
|                  | 25% increase  | $9.79 \times 10^{-4}$<br>( $7.39 \times 10^{-5}$ ) | $04.93 \times 10^{-2}$<br>( $3.37 \times 10^{-2}$ ) | $1.42 \times 10^{-3}$<br>( $1.08 \times 10^{-4}$ ) | $7.65 \times 10^{-4}$<br>( $1.47 \times 10^{-4}$ )                                   | <b><math>6.89 \times 10^{-4}</math></b><br><b>(<math>1.42 \times 10^{-4}</math>)</b> |
| Medium (35%)     | 25% decrease  | $3.71 \times 10^{-4}$<br>( $1.74 \times 10^{-4}$ ) | $1.80 \times 10^{-2}$<br>( $1.90 \times 10^{-2}$ )  | $5.37 \times 10^{-3}$<br>( $2.73 \times 10^{-4}$ ) | <b><math>2.30 \times 10^{-3}</math></b><br><b>(<math>3.58 \times 10^{-4}</math>)</b> | $2.62 \times 10^{-3}$<br>( $2.82 \times 10^{-4}$ )                                   |
|                  | baseline      | $3.66 \times 10^{-3}$<br>( $2.13 \times 10^{-4}$ ) | $2.40 \times 10^{-2}$<br>( $2.53 \times 10^{-2}$ )  | $5.28 \times 10^{-3}$<br>( $3.26 \times 10^{-4}$ ) | <b><math>2.23 \times 10^{-3}</math></b><br><b>(<math>3.81 \times 10^{-4}</math>)</b> | $2.59 \times 10^{-3}$<br>( $2.97 \times 10^{-4}$ )                                   |
|                  | 25% increase  | $3.62 \times 10^{-3}$<br>( $2.22 \times 10^{-4}$ ) | $2.64 \times 10^{-2}$<br>( $2.70 \times 10^{-2}$ )  | $5.28 \times 10^{-3}$<br>( $3.52 \times 10^{-4}$ ) | <b><math>2.18 \times 10^{-3}</math></b><br><b>(<math>3.74 \times 10^{-4}</math>)</b> | $2.56 \times 10^{-3}$<br>( $2.98 \times 10^{-4}$ )                                   |
| High (65%)       | 25% decrease  | $7.29 \times 10^{-3}$<br>( $2.44 \times 10^{-4}$ ) | $1.81 \times 10^{-2}$<br>( $2.36 \times 10^{-2}$ )  | $1.07 \times 10^{-2}$<br>( $5.51 \times 10^{-4}$ ) | <b><math>2.76 \times 10^{-3}</math></b><br><b>(<math>5.27 \times 10^{-4}</math>)</b> | $5.16 \times 10^{-3}$<br>( $4.00 \times 10^{-4}$ )                                   |
|                  | baseline      | $7.23 \times 10^{-3}$<br>( $2.92 \times 10^{-4}$ ) | $1.91 \times 10^{-2}$<br>( $2.54 \times 10^{-2}$ )  | $1.06 \times 10^{-2}$<br>( $5.77 \times 10^{-4}$ ) | <b><math>2.70 \times 10^{-3}</math></b><br><b>(<math>5.55 \times 10^{-4}</math>)</b> | $5.12 \times 10^{-3}$<br>( $4.25 \times 10^{-4}$ )                                   |

|                               |               |                                                    |                                                                  |                                                    |                                                                                      |                                                                                                    |
|-------------------------------|---------------|----------------------------------------------------|------------------------------------------------------------------|----------------------------------------------------|--------------------------------------------------------------------------------------|----------------------------------------------------------------------------------------------------|
|                               | 25% increase  | $7.17 \times 10^{-3}$<br>( $3.41 \times 10^{-4}$ ) | $2.24 \times 10^{-2}$<br>( $2.73 \times 10^{-2}$ ) <sup>2)</sup> | $1.08 \times 10^{-2}$<br>( $7.38 \times 10^{-4}$ ) | <b><math>2.63 \times 10^{-3}</math></b><br><b>(<math>5.67 \times 10^{-4}</math>)</b> | $5.06 \times 10^{-3}$<br>( $4.43 \times 10^{-4}$ )                                                 |
| Severe<br>(90%)               | 25% decrease  | $1.06 \times 10^{-2}$<br>( $2.05 \times 10^{-4}$ ) | $5.78 \times 10^{-2}$<br>( $1.37 \times 10^{-1}$ ) <sup>1)</sup> | $1.75 \times 10^{-2}$<br>( $3.01 \times 10^{-3}$ ) | <b><math>1.54 \times 10^{-3}</math></b><br><b>(<math>6.41 \times 10^{-4}</math>)</b> | $7.47 \times 10^{-3}$<br>( $4.95 \times 10^{-4}$ )                                                 |
|                               | baseline      | $1.05 \times 10^{-2}$<br>( $2.48 \times 10^{-4}$ ) | $6.43 \times 10^{-2}$<br>( $1.48 \times 10^{-1}$ ) <sup>1)</sup> | $1.70 \times 10^{-2}$<br>( $2.38 \times 10^{-3}$ ) | <b><math>1.55 \times 10^{-3}</math></b><br><b>(<math>7.29 \times 10^{-4}</math>)</b> | $7.44 \times 10^{-3}$<br>( $4.98 \times 10^{-4}$ )                                                 |
|                               | 25% increase  | $1.05 \times 10^{-2}$<br>( $2.74 \times 10^{-4}$ ) | $8.53 \times 10^{-2}$<br>( $1.86 \times 10^{-1}$ ) <sup>1)</sup> | $1.79 \times 10^{-2}$<br>( $3.12 \times 10^{-3}$ ) | <b><math>1.47 \times 10^{-3}</math></b><br><b>(<math>7.29 \times 10^{-4}</math>)</b> | $7.40 \times 10^{-3}$<br>( $5.05 \times 10^{-4}$ )                                                 |
| Real Life<br>Example<br>(97%) | 25% decrease  | $1.16 \times 10^{-2}$<br>( $1.36 \times 10^{-4}$ ) | $1.59 \times 10^{-1}$<br>( $3.20 \times 10^{-1}$ ) <sup>1)</sup> | $3.08 \times 10^{-2}$<br>( $2.41 \times 10^{-2}$ ) | <b><math>1.01 \times 10^{-3}</math></b><br><b>(<math>1.30 \times 10^{-3}</math>)</b> | $8.17 \times 10^{-3}$<br>( $4.94 \times 10^{-4}$ )                                                 |
|                               | baseline      | $1.15 \times 10^{-2}$<br>( $1.55 \times 10^{-4}$ ) | $1.77 \times 10^{-1}$<br>( $3.4 \times 10^{-1}$ ) <sup>1)</sup>  | $3.02 \times 10^{-2}$<br>( $2.39 \times 10^{-2}$ ) | <b><math>9.55 \times 10^{-4}</math></b><br><b>(<math>1.22 \times 10^{-3}</math>)</b> | $8.15 \times 10^{-3}$<br>( $4.95 \times 10^{-4}$ )                                                 |
|                               | 25% increase  | $1.15 \times 10^{-2}$<br>( $1.61 \times 10^{-4}$ ) | $1.83 \times 10^{-2}$<br>( $3.39 \times 10^{-1}$ ) <sup>1)</sup> | $3.08 \times 10^{-2}$<br>( $2.52 \times 10^{-2}$ ) | <b><math>9.45 \times 10^{-4}</math></b><br><b>(<math>1.21 \times 10^{-3}</math>)</b> | $8.13 \times 10^{-3}$<br>( $5.01 \times 10^{-4}$ )                                                 |
| Altered GeoSD                 |               |                                                    |                                                                  |                                                    |                                                                                      |                                                                                                    |
| Censoring Degree              | Model Version | Substitution                                       | MLE                                                              | KM                                                 | MI method 1                                                                          | MI method 2                                                                                        |
| Low<br>(10%)                  | 25% decrease  | $1.07 \times 10^{-3}$<br>( $3.48 \times 10^{-5}$ ) | $1.67 \times 10^{-2}$<br>( $1.08 \times 10^{-2}$ ) <sup>2)</sup> | $1.53 \times 10^{-3}$                              | $9.11 \times 10^{-4}$<br>( $1.32 \times 10^{-4}$ ) <sup>4)</sup>                     | <b><math>7.52 \times 10^{-4}</math></b><br><b>(<math>1.43 \times 10^{-5}</math>)</b> <sup>5)</sup> |

|                 |              |                                                       |                                                       |                                                       |                                                                  |                                                                  |
|-----------------|--------------|-------------------------------------------------------|-------------------------------------------------------|-------------------------------------------------------|------------------------------------------------------------------|------------------------------------------------------------------|
|                 |              |                                                       |                                                       | (5.03 x 10 <sup>-5</sup> )                            |                                                                  |                                                                  |
|                 | baseline     | 9.99 x 10 <sup>-4</sup><br>(6.61 x 10 <sup>-5</sup> ) | 4.56 x 10 <sup>-2</sup><br>(3.09 x 10 <sup>-2</sup> ) | 1.43 x 10 <sup>-3</sup><br>(9.46 x 10 <sup>-5</sup> ) | 7.78 x 10 <sup>-4</sup><br>(1.41 x 10 <sup>-4</sup> )            | <b>6.94 x 10<sup>-4</sup></b><br><b>(1.39 x 10<sup>-4</sup>)</b> |
|                 | 25% increase | 8.92 x 10 <sup>-4</sup><br>(1.12 x 10 <sup>-4</sup> ) | 8.59 x 10 <sup>-2</sup><br>(5.99 x 10 <sup>-2</sup> ) | 1.30 x 10 <sup>-3</sup><br>(1.62 x 10 <sup>-4</sup> ) | 6.70 x 10 <sup>-4</sup><br>(1.52 x 10 <sup>-4</sup> )            | <b>6.22 x 10<sup>-4</sup></b><br><b>(1.42 x 10<sup>-4</sup>)</b> |
| Medium<br>(35%) | 25% decrease | 3.87 x 10 <sup>-3</sup><br>(9.71 x 10 <sup>-5</sup> ) | 7.62 x 10 <sup>-3</sup><br>(7.34 x 10 <sup>-3</sup> ) | 5.57 x 10 <sup>-3</sup><br>(1.82 x 10 <sup>-4</sup> ) | <b>2.58 x 10<sup>-3</sup></b><br><b>(3.39 x 10<sup>-4</sup>)</b> | 2.74 x 10 <sup>-3</sup><br>(2.74 x 10 <sup>-4</sup> )            |
|                 | baseline     | 3.66 x 10 <sup>-3</sup><br>(2.13 x 10 <sup>-4</sup> ) | 2.40 x 10 <sup>-2</sup><br>(2.53 x 10 <sup>-2</sup> ) | 5.28 x 10 <sup>-3</sup><br>(3.26 x 10 <sup>-4</sup> ) | <b>2.23 x 10<sup>-3</sup></b><br><b>(3.81 x 10<sup>-4</sup>)</b> | 2.59 x 10 <sup>-3</sup><br>(2.97 x 10 <sup>-4</sup> )            |
|                 | 25% increase | 3.38 x 10 <sup>-4</sup><br>(3.70 x 10 <sup>-4</sup> ) | 4.81 x 10 <sup>-2</sup><br>(5.17 x 10 <sup>-2</sup> ) | 4.96 x 10 <sup>-3</sup><br>(5.55 x 10 <sup>-4</sup> ) | <b>1.95 x 10<sup>-3</sup></b><br><b>(4.24 x 10<sup>-4</sup>)</b> | 2.39 x 10 <sup>-3</sup><br>(3.38 x 10 <sup>-4</sup> )            |
| High<br>(65%)   | 25% decrease | 7.47 x 10 <sup>-3</sup><br>(1.35 x 10 <sup>-4</sup> ) | 9.63 x 10 <sup>-3</sup><br>(9.52 x 10 <sup>-3</sup> ) | 1.10 x 10 <sup>-2</sup><br>(5.77 x 10 <sup>-4</sup> ) | <b>3.11 x 10<sup>-3</sup></b><br><b>(5.32 x 10<sup>-4</sup>)</b> | 5.29 x 10 <sup>-3</sup><br>(3.84 x 10 <sup>-4</sup> )            |
|                 | baseline     | 7.23 x 10 <sup>-3</sup><br>(2.92 x 10 <sup>-4</sup> ) | 1.91 x 10 <sup>-2</sup><br>(2.54 x 10 <sup>-2</sup> ) | 1.06 x 10 <sup>-2</sup><br>(5.77 x 10 <sup>-4</sup> ) | <b>2.70 x 10<sup>-3</sup></b><br><b>(5.55 x 10<sup>-4</sup>)</b> | 5.12 x 10 <sup>-3</sup><br>(4.25 x 10 <sup>-4</sup> )            |
|                 | 25% increase | 6.94 x 10 <sup>-3</sup><br>(5.32 x 10 <sup>-4</sup> ) | 3.75 x 10 <sup>-2</sup><br>(4.78 x 10 <sup>-2</sup> ) | 1.04 x 10 <sup>-2</sup><br>(9.09 x 10 <sup>-4</sup> ) | <b>2.38 x 10<sup>-3</sup></b><br><b>(5.58 x 10<sup>-4</sup>)</b> | 4.91 x 10 <sup>-3</sup><br>(5.14 x 10 <sup>-4</sup> )            |

|                            |               |                                                    |                                                                  |                                                    |                                                                                      |                                                                                                    |
|----------------------------|---------------|----------------------------------------------------|------------------------------------------------------------------|----------------------------------------------------|--------------------------------------------------------------------------------------|----------------------------------------------------------------------------------------------------|
| Severe<br>(90%)            | 25% decrease  | $1.07 \times 10^{-2}$<br>( $1.18 \times 10^{-4}$ ) | $2.74 \times 10^{-2}$<br>( $8.27 \times 10^{-2}$ ) <sup>2)</sup> | $1.76 \times 10^{-2}$<br>( $3.03 \times 10^{-3}$ ) | <b><math>1.81 \times 10^{-3}</math></b><br><b>(<math>7.59 \times 10^{-4}</math>)</b> | $7.53 \times 10^{-3}$<br>( $4.76 \times 10^{-4}$ )                                                 |
|                            | baseline      | $1.05 \times 10^{-2}$<br>( $2.48 \times 10^{-4}$ ) | $6.43 \times 10^{-2}$<br>( $1.48 \times 10^{-1}$ ) <sup>1)</sup> | $1.70 \times 10^{-2}$<br>( $2.38 \times 10^{-3}$ ) | <b><math>1.55 \times 10^{-3}</math></b><br><b>(<math>7.29 \times 10^{-4}</math>)</b> | $7.44 \times 10^{-3}$<br>( $4.98 \times 10^{-4}$ )                                                 |
|                            | 25% increase  | $1.04 \times 10^{-2}$<br>( $4.09 \times 10^{-4}$ ) | $1.24 \times 10^{-1}$<br>( $2.34 \times 10^{-1}$ ) <sup>1)</sup> | $1.79 \times 10^{-2}$<br>( $3.37 \times 10^{-3}$ ) | <b><math>1.33 \times 10^{-3}</math></b><br><b>(<math>6.26 \times 10^{-4}</math>)</b> | $7.34 \times 10^{-3}$<br>( $5.5 \times 10^{-4}$ )                                                  |
| Real Life Example<br>(97%) | 25% decrease  | $1.16 \times 10^{-2}$<br>( $9.08 \times 10^{-5}$ ) | $9.09 \times 10^{-2}$<br>( $2.44 \times 10^{-1}$ ) <sup>1)</sup> | $2.88 \times 10^{-2}$<br>( $1.86 \times 10^{-2}$ ) | <b><math>1.18 \times 10^{-3}</math></b><br><b>(<math>1.43 \times 10^{-3}</math>)</b> | $8.20 \times 10^{-3}$<br>( $4.85 \times 10^{-4}$ )                                                 |
|                            | baseline      | $1.15 \times 10^{-2}$<br>( $1.55 \times 10^{-4}$ ) | $1.77 \times 10^{-1}$<br>( $3.4 \times 10^{-1}$ ) <sup>1)</sup>  | $3.02 \times 10^{-2}$<br>( $2.39 \times 10^{-2}$ ) | <b><math>9.55 \times 10^{-4}</math></b><br><b>(<math>1.22 \times 10^{-3}</math>)</b> | $8.15 \times 10^{-3}$<br>( $4.95 \times 10^{-4}$ )                                                 |
|                            | 25% increase  | $1.15 \times 10^{-2}$<br>( $2.83 \times 10^{-4}$ ) | $2.19 \times 10^{-1}$<br>( $3.69 \times 10^{-1}$ ) <sup>1)</sup> | $3.24 \times 10^{-2}$<br>( $2.84 \times 10^{-2}$ ) | <b><math>9.01 \times 10^{-4}</math></b><br><b>(<math>1.25 \times 10^{-3}</math>)</b> | $8.10 \times 10^{-3}$<br>( $5.21 \times 10^{-4}$ )                                                 |
| Altered LOD                |               |                                                    |                                                                  |                                                    |                                                                                      |                                                                                                    |
| Censoring Degree           | Model Version | Substitution                                       | MLE                                                              | KM                                                 | MI method 1                                                                          | MI method 2                                                                                        |
| Low<br>(10%)               | 25% decrease  | $7.69 \times 10^{-4}$<br>( $4.81 \times 10^{-5}$ ) | $4.14 \times 10^{-2}$<br>( $2.90 \times 10^{-2}$ ) <sup>2)</sup> | $1.11 \times 10^{-3}$<br>( $6.82 \times 10^{-5}$ ) | $6.00 \times 10^{-4}$<br>( $1.11 \times 10^{-4}$ ) <sup>4)</sup>                     | <b><math>5.38 \times 10^{-4}</math></b><br><b>(<math>1.10 \times 10^{-4}</math>)</b> <sup>4)</sup> |
|                            | baseline      | $9.99 \times 10^{-4}$<br>( $6.61 \times 10^{-5}$ ) | $4.56 \times 10^{-2}$<br>( $3.09 \times 10^{-2}$ ) <sup>2)</sup> | $1.43 \times 10^{-3}$<br>( $9.46 \times 10^{-5}$ ) | $7.78 \times 10^{-4}$<br>( $1.41 \times 10^{-4}$ ) <sup>4)</sup>                     | <b><math>6.94 \times 10^{-4}</math></b><br><b>(<math>1.39 \times 10^{-4}</math>)</b> <sup>4)</sup> |

|                 |              |                                                    |                                                    |                                                    |                                                                                        |                                                                                        |
|-----------------|--------------|----------------------------------------------------|----------------------------------------------------|----------------------------------------------------|----------------------------------------------------------------------------------------|----------------------------------------------------------------------------------------|
|                 | 25% increase | $1.21 \times 10^{-3}$<br>( $8.83 \times 10^{-5}$ ) | $4.61 \times 10^{-2}$<br>( $3.11 \times 10^{-2}$ ) | $1.73 \times 10^{-3}$<br>( $1.25 \times 10^{-4}$ ) | $9.58 \times 10^{-4}$<br>( $1.75 \times 10^{-4}$ )                                     | <b><math>8.49 \times 10^{-4}</math></b><br>( <b><math>1.72 \times 10^{-4}</math></b> ) |
| Medium<br>(35%) | 25% decrease | $2.80 \times 10^{-3}$<br>( $1.44 \times 10^{-4}$ ) | $2.27 \times 10^{-2}$<br>( $2.39 \times 10^{-2}$ ) | $4.06 \times 10^{-3}$<br>( $2.22 \times 10^{-4}$ ) | <b><math>1.69 \times 10^{-3}</math></b><br>( <b><math>2.83 \times 10^{-4}</math></b> ) | $1.98 \times 10^{-3}$<br>( $2.21 \times 10^{-4}$ )                                     |
|                 | baseline     | $3.66 \times 10^{-3}$<br>( $2.13 \times 10^{-4}$ ) | $2.40 \times 10^{-2}$<br>( $2.53 \times 10^{-2}$ ) | $5.28 \times 10^{-3}$<br>( $3.26 \times 10^{-4}$ ) | <b><math>2.23 \times 10^{-3}</math></b><br>( <b><math>3.81 \times 10^{-4}</math></b> ) | $2.59 \times 10^{-3}$<br>( $2.97 \times 10^{-4}$ )                                     |
|                 | 25% increase | $4.48 \times 10^{-3}$<br>( $2.69 \times 10^{-4}$ ) | $2.30 \times 10^{-2}$<br>( $2.33 \times 10^{-2}$ ) | $6.45 \times 10^{-3}$<br>( $3.92 \times 10^{-4}$ ) | <b><math>2.77 \times 10^{-3}</math></b><br>( <b><math>4.63 \times 10^{-4}</math></b> ) | $3.17 \times 10^{-3}$<br>( $3.52 \times 10^{-4}$ )                                     |
| High<br>(65%)   | 25% decrease | $5.48 \times 10^{-3}$<br>( $2.06 \times 10^{-4}$ ) | $1.75 \times 10^{-2}$<br>( $2.23 \times 10^{-2}$ ) | $8.10 \times 10^{-3}$<br>( $4.83 \times 10^{-4}$ ) | <b><math>2.00 \times 10^{-3}</math></b><br>( <b><math>4.11 \times 10^{-4}</math></b> ) | $3.88 \times 10^{-3}$<br>( $3.14 \times 10^{-4}$ )                                     |
|                 | baseline     | $7.23 \times 10^{-3}$<br>( $2.92 \times 10^{-4}$ ) | $1.91 \times 10^{-2}$<br>( $2.54 \times 10^{-2}$ ) | $1.06 \times 10^{-2}$<br>( $5.77 \times 10^{-4}$ ) | <b><math>2.70 \times 10^{-3}</math></b><br>( <b><math>5.55 \times 10^{-4}</math></b> ) | $5.12 \times 10^{-3}$<br>( $4.25 \times 10^{-4}$ )                                     |
|                 | 25% increase | $8.92 \times 10^{-3}$<br>( $3.91 \times 10^{-4}$ ) | $2.31 \times 10^{-2}$<br>( $2.96 \times 10^{-2}$ ) | $1.30 \times 10^{-2}$<br>( $7.35 \times 10^{-4}$ ) | <b><math>3.36 \times 10^{-3}</math></b><br>( <b><math>6.89 \times 10^{-4}</math></b> ) | $6.31 \times 10^{-3}$<br>( $5.32 \times 10^{-4}$ )                                     |
| Severe<br>(90%) | 25% decrease | $7.93 \times 10^{-3}$<br>( $1.70 \times 10^{-4}$ ) | $6.73 \times 10^{-2}$<br>( $1.65 \times 10^{-1}$ ) | $1.33 \times 10^{-2}$<br>( $2.38 \times 10^{-3}$ ) | <b><math>1.11 \times 10^{-3}</math></b><br>( <b><math>5.14 \times 10^{-4}</math></b> ) | $5.59 \times 10^{-3}$<br>( $3.74 \times 10^{-4}$ )                                     |
|                 | baseline     | $1.05 \times 10^{-2}$<br>( $2.48 \times 10^{-4}$ ) | $6.43 \times 10^{-2}$<br>( $1.48 \times 10^{-1}$ ) | $1.70 \times 10^{-2}$                              | <b><math>1.55 \times 10^{-3}</math></b><br>( <b><math>7.29 \times 10^{-4}</math></b> ) | $7.44 \times 10^{-3}$<br>( $4.98 \times 10^{-4}$ )                                     |



|                         |              |                                                       |                                                       |                                                       |                                                                  |                                                       |
|-------------------------|--------------|-------------------------------------------------------|-------------------------------------------------------|-------------------------------------------------------|------------------------------------------------------------------|-------------------------------------------------------|
|                         |              |                                                       |                                                       | (2.38 x 10 <sup>-3</sup> )                            |                                                                  |                                                       |
|                         | 25% increase | 1.31 x 10 <sup>-2</sup><br>(3.21 x 10 <sup>-4</sup> ) | 7.15 x 10 <sup>-2</sup><br>(1.59 x 10 <sup>-1</sup> ) | 2.16 x 10 <sup>-2</sup><br>(3.85 x 10 <sup>-3</sup> ) | <b>1.93 x 10<sup>-3</sup></b><br><b>(8.91 x 10<sup>-4</sup>)</b> | 9.27 x 10 <sup>-3</sup><br>(6.27 x 10 <sup>-4</sup> ) |
| Real Life Example (97%) | 25% decrease | 8.66 x 10 <sup>-3</sup><br>(1.21 x 10 <sup>-4</sup> ) | 1.57 x 10 <sup>-1</sup><br>(3.24 x 10 <sup>-1</sup> ) | 2.37 x 10 <sup>-2</sup><br>(2.37 x 10 <sup>-2</sup> ) | <b>7.19 x 10<sup>-4</sup></b><br><b>(8.92 x 10<sup>-4</sup>)</b> | 6.11 x 10 <sup>-3</sup><br>(3.75 x 10 <sup>-4</sup> ) |
|                         | baseline     | 1.15 x 10 <sup>-2</sup><br>(1.55 x 10 <sup>-4</sup> ) | 1.77 x 10 <sup>-1</sup><br>(3.4 x 10 <sup>-1</sup> )  | 3.02 x 10 <sup>-2</sup><br>(2.39 x 10 <sup>-2</sup> ) | <b>9.55 x 10<sup>-4</sup></b><br><b>(1.22 x 10<sup>-3</sup>)</b> | 8.15 x 10 <sup>-3</sup><br>(4.95 x 10 <sup>-4</sup> ) |
|                         | 25% increase | 1.44 x 10 <sup>-2</sup><br>(2.07 x 10 <sup>-4</sup> ) | 1.68 x 10 <sup>-1</sup><br>(3.25 x 10 <sup>-1</sup> ) | 3.67 x 10 <sup>-2</sup><br>(2.76 x 10 <sup>-2</sup> ) | <b>1.23 x 10<sup>-3</sup></b><br><b>(1.63 x 10<sup>-3</sup>)</b> | 1.02 x 10 <sup>-2</sup><br>(6.17 x 10 <sup>-4</sup> ) |

\*Bolted values indicate that these were the closest to the known values for that degree of censoring
